# Supplementary material for: Correcting Errors in Image Encryption Based on DNA Coding
Source: PubMed Central journal article supplement (PMC6222733; doi:10.3390/molecules23081878), 2018-07-27
Supplement: molecules-23-01878-s001.pdf [file molecules-23-01878-s001.pdf]

# Supplement

This supplement lists all DNA coding used into this paper.

$$A_4^{SS+SC+GC}(8,3) = 336$$

- 1 ATCATGCC
- 2 CTCGATCA
- 3 GCTCTTCT
- 4 AGTGGGAT
- 5 ACTCTCTG
- 6 AATCTGCG
- 7 ACTCACGT
- 8 CTCCAAC
- 9 GCTTCTAG
- 10 TAGGAGGT
- 11 GATCGACT
- 12 TAACGCTG
- 13 TAAGCGGA
- 14 CTGTGATC
- 15 CCCTAATC
- 16 TGGAAGGA
- 17 TACTACCG
- 18 CTTATGGG
- 19 TCAGCAAG
- 20 CGACTTCT
- 21 AGTGTCGA
- 22 TGCGATTC
- 23 CAACGACA
- 24 GATCTGTC
- 25 GCCAACTA
- 26 ATGAGGGA
- 27 TAGAACGG
- 28 CCGTAACA
- 29 TAGACTGC
- 30 GCTGGATT
- 31 GTGAGTCA
- 32 TCATGGAC
- 33 ACCACTAC
- 34 TCCTAAGG
- 35 GGCTAAAG
- 36 CCAACTGA
- 37 TCGTCTTG
- 38 TTGGGAAC
- 39 AATAGCCC

40 CTGTCGAA  
41 CCCCATAT  
42 AACCTCTC  
43 GGTTTACG  
44 GCAGAAGA  
45 TAGAGGAG  
46 GAAAGGGA  
47 ATCGACGA  
48 GCAAGTAC  
49 TCAGACAC  
50 CTTGGTTG  
51 TAGCATCC  
52 GATACTCG  
53 AATGCCCT  
54 AACCTAG  
55 CACACGTA  
56 GCCTATCT  
57 GAGCTCTA  
58 TGAAGCGA  
59 TAACCGCT  
60 GAACTCGT  
61 GAGGGAAA  
62 TGTCTAGC  
63 CGAACCTT  
64 AGGAATCC  
65 AGGTGGAA  
66 TACCCAGT  
67 TCACGTAG  
68 TATCCGTG  
69 TTCGAACC  
70 AGCTCTGA  
71 GTTGACACA  
72 AAGCCGTT  
73 TCACATGC  
74 CCCAAGAA  
75 CTCAGTCT  
76 ATCGGTAG  
77 ACGGACAA  
78 CCAGTTCA  
79 TTATCCCG  
80 GTACGATG  
81 TCTACGGT  
82 CAACCTTC  
83 GTCATCCA

84 ACTACACG  
85 CGGTTTTG  
86 ACCAACAG  
87 ACGCATAAC  
88 TGACGTGT  
89 ATGACCTC  
90 CTTGACTC  
91 CATTCGA  
92 TGTGAACG  
93 TGGCGATA  
94 ACGTTGGA  
95 ATTCAGGC  
96 GTAGTCAG  
97 AAGCGTCT  
98 TCTCTGGA  
99 GACACCTT  
100 ACCCTAAC  
101 AGCTTAGG  
102 TGACATCG  
103 GAACAACC  
104 ATGCTCGT  
105 CACCTGTT  
106 AGTCCAAG  
107 CGTCATAG  
108 AGCTTGTC  
109 GCGATAGA  
110 TCCAGTT  
111 GCGCATT  
112 GTTCAGCT  
113 AGAGGCAA  
114 TAAGGTGC  
115 CAGACGAT  
116 TCGGATGA  
117 GAATGAGG  
118 CTCTCAG  
119 CGGTGAAT  
120 CGCAAAGA  
121 ACGTAGTG  
122 CACTGCAA  
123 TTGGCGTT  
124 CAATCCTG  
125 CTCGCTTT  
126 TGGTTCAG  
127 CGCCTAAT

128 GAAACCAG  
129 CCTTGATG  
130 TGGATTCC  
131 ATGTTGCG  
132 GCAAAACG  
133 TCAGCCTT  
134 ACGGAACT  
135 AAACGGTC  
136 GCCCTTAA  
137 GGACTACA  
138 CCATAGAG  
139 ATAGGGAC  
140 AGTCGTGA  
141 CCTGTGTT  
142 AGGCTTTC  
143 CTACATCC  
144 AGCACGTT  
145 GGAGAGAT  
146 CCTTGCAT  
147 TGCCACAA  
148 CAAAAGGC  
149 GGTCACTA  
150 AGAACGGA  
151 CTGAAGTC  
152 CACCTTGA  
153 CATTGCT  
154 ATGTGCAG  
155 TAAACCCC  
156 ACATGCTG  
157 CATTCCG  
158 ACCTTGAG  
159 GATGGTCA  
160 TCTACCTG  
161 CTAACCTG  
162 GTACCCTT  
163 GCATCAAC  
164 AAGCAGGA  
165 CAGTACAC  
166 ATGGAGAG  
167 CGTACTTG  
168 GGTTTGGT  
169 CAAAGCAC  
170 CTAAGCTG  
171 CAGTTGCA

172 ACTGATCG  
173 TTAGGTCG  
174 ACTTGCGA  
175 GTGGTTCT  
176 CCGTCATT  
177 TTGAGTGG  
178 CATCGCTT  
179 CTGGTCAA  
180 ATGAGACC  
181 CCTCCATA  
182 AGATGGCT  
183 ACGACGTA  
184 TTACACGG  
185 TCTGACCA  
186 CAAGGGAA  
187 CAGACATC  
188 CGAATGTG  
189 ACGCCAAA  
190 TCTGCGAA  
191 ATGTCCCA  
192 TATCGGGT  
193 ACTGCATC  
194 CTAGACCT  
195 AACTAGG  
196 TCTCGAAC  
197 TTCCGACA  
198 GTACACCA  
199 GTTTCGTG  
200 GGGATTGT  
201 AGATACCG  
202 GTACAGAC  
203 GTTAACGG  
204 TGATCTCC  
205 AAGACCGT  
206 TTTTGCCC  
207 CAAAGTGG  
208 GGTGTTAC  
209 GTCGAGTA  
210 GTTAGCTC  
211 CGATACTC  
212 GCTATCAG  
213 TTCGTGCA  
214 GCAACTCT  
215 GGACCAAT

216 AGTTTCCC  
217 ACCGATGT  
218 AGGAGCTA  
219 GAGTGTGT  
220 ACACTGCT  
221 CTCTGAGT  
222 GCAGATAG  
223 CGAAGTTC  
224 TGAAAGCC  
225 GCAATGCA  
226 ATCGCAAC  
227 ATGCTGAC  
228 GACTCTTC  
229 AGGACACA  
230 CTCACATG  
231 GGTAGAAC  
232 GGATTGAC  
233 CGTAGGTA  
234 AAGGAAGC  
235 CAGACTCA  
236 GTCTAAGC  
237 TGGGTACA  
238 CACTTAGC  
239 GATCCTGA  
240 CTTATCCC  
241 TAACTGGG  
242 AGTAAGGG  
243 AGAGTGCA  
244 AAAGGGGT  
245 CATGGGTC  
246 AACTGTCTG  
247 ATAGCCGT  
248 TATGCTCC  
249 GATACGAC  
250 GTACGTCT  
251 ACTTCGCA  
252 CGCTATAC  
253 TCTGAGTC  
254 ACGAATGG  
255 GCGAAGAT  
256 CGCTTCTT  
257 ACGGTAAG  
258 ATTGCCAG  
259 TCTAGCCT

260 AACTAGCC  
261 TCGGGTTT  
262 ACTTCCAC  
263 TAGCCCAA  
264 TACGCATC  
265 TACGATGG  
266 TATGGGAC  
267 GGCGTAAA  
268 CAAGGTCT  
269 TTCTGGTC  
270 CTGCTACT  
271 TGGTTGCT  
272 ATCTGCCT  
273 CCAGGAAT  
274 GGTCCTTT  
275 AGCAAGAC  
276 GAGGCTTT  
277 CCTACCAA  
278 ACGTTTCC  
279 ACAGTGTG  
280 ATGGCTTG  
281 TTTGTGGC  
282 CACATGAC  
283 TAAGTGCC  
284 CTTTGAG  
285 CGCTTGAA  
286 ATCACGAG  
287 TGCCTTAG  
288 AAGTTCGG  
289 TCGTACCT  
290 ATAGCACG  
291 GACAGTAG  
292 GGAATCTC  
293 AGTCAGCA  
294 ATGTCAGC  
295 GTGTGGAT  
296 TCGCACTA  
297 ACTTGACC  
298 GTTTGTGG  
299 GAATGTCC  
300 TATCACGC  
301 CCTGAAAG  
302 CATCCGAA  
303 GTGCAATC

304 TGTTGTC  
 305 GGTGATTG  
 306 GCAGTACT  
 307 CGTCTATG  
 308 TCGGTTAC  
 309 AACCATGC  
 310 GCTACTTC  
 311 TGAGGGTA  
 312 TACAGGCA  
 313 GCTGTTGA  
 314 GTGTCACT  
 315 GTCCTAGT  
 316 CACCAACT  
 317 CGCCATTA  
 318 ATACCGCA  
 319 CGTGGAAA  
 320 GCACTATC  
 321 CTCCTTAC  
 322 AGTGCTCA  
 323 TACACCGA  
 324 TCGTGAAG  
 325 TGCTCATG  
 326 GCAAGAGT  
 327 GTGTTGTC  
 328 GCACGAAA  
 329 ATCCTGGA  
 330 ATGGGTGT  
 331 AGCGTCAT  
 332 CTAGCCTA  
 333 ATCCTTCG  
 334 ATCCGTTT  
 335 AGAATCGG  
 336 TCTGTACC

|    |          |    |          |    |          |    |          |    |          |
|----|----------|----|----------|----|----------|----|----------|----|----------|
| 0  | ATCATGCC | 1  | CTCGATCA | 2  | GCTCTTCT | 3  | AGTGGGAT | 4  | ACTCTCTG |
| 5  | AATCTGCG | 6  | ACTCACGT | 7  | CTTCCAAC | 8  | GCTTCTAG | 9  | TAGGAGGT |
| 10 | GATCGACT | 11 | TAACGCTG | 12 | TAAGCGGA | 13 | CTGTGATC | 14 | CCCTAATC |
| 15 | TGGAAGGA | 16 | TACTACCG | 17 | CTTATGGG | 18 | TCAGCAAG | 19 | CGACTTCT |
| 20 | AGTGTCGA | 21 | TGCGATTC | 22 | CAACGACA | 23 | GATCTGTC | 24 | GCCAACTA |
| 25 | ATGAGGGA | 26 | TAGAACGG | 27 | CCGTAACA | 28 | TAGACTGC | 29 | GCTGGATT |
| 30 | GTGAGTCA | 31 | TCATGGAC | 32 | ACCACTAC | 33 | TCCTAAGG | 34 | GGCTAAAG |
| 35 | CCAACTGA | 36 | TCGTCTTG | 37 | TTGGGAAC | 38 | AATAGCCC | 39 | CTGTGCGA |
| 40 | CCCCATAT | 41 | AACCTCTC | 42 | GGTTTACG | 43 | GCAGAAGA | 44 | TAGAGGAG |
| 45 | GAAAGGGA | 46 | ATCGACGA | 47 | GCAAGTAC | 48 | TCAGACAC | 49 | CTTGTTG  |



|     |          |     |          |     |          |     |          |     |           |
|-----|----------|-----|----------|-----|----------|-----|----------|-----|-----------|
| 50  | TAGCATCC | 51  | GATACTCG | 52  | AATGCCCT | 53  | AACCCTAG | 54  | CACACGTA  |
| 55  | GCCTATCT | 56  | GAGCTCTA | 57  | TGAAGCGA | 58  | TAACCGCT | 59  | GAACCTGT  |
| 60  | GAGGGAAA | 61  | TGTCTAGC | 62  | CGAACCTT | 63  | AGGAATCC | 64  | AGGTGGAA  |
| 65  | TACCCAGT | 66  | TCACGTAG | 67  | TATCCGTG | 68  | TTCGAACC | 69  | AGCTCTGA  |
| 70  | GTTGCACA | 71  | AAGCCGTT | 72  | TCACATGC | 73  | CCCAAGAA | 74  | CTCAGTCT  |
| 75  | ATCGGTAG | 76  | ACGGACAA | 77  | CCAGTTCA | 78  | TTATCCCG | 79  | GTACGATG  |
| 80  | TCTACGGT | 81  | CAACCTTC | 82  | GTCATCCA | 83  | ACTACACG | 84  | CGGTTTTG  |
| 85  | ACCAACAG | 86  | ACGCATAC | 87  | TGACGTGT | 88  | ATGACCTC | 89  | CTTGACTC  |
| 90  | CATTCCGA | 91  | TGTGAACG | 92  | TGGCGATA | 93  | ACGTTGGA | 94  | ATTCAGGC  |
| 95  | GTAGTCAG | 96  | AAGCGTCT | 97  | TCTCTGGA | 98  | GACACCTT | 99  | ACCCTAAC  |
| 100 | AGCTTAGG | 101 | TGACATCG | 102 | GAACAACC | 103 | ATGCTCGT | 104 | CACCTGTT  |
| 105 | AGTCCAAG | 106 | CGTCATAG | 107 | AGCTTGTC | 108 | GCGATAGA | 109 | TCCCAGTT  |
| 110 | GCGCATT  | 111 | GTTCAGCT | 112 | AGAGGCAA | 113 | TAAGGTGC | 114 | CAGACGAT  |
| 115 | TCGGATGA | 116 | GAATGAGG | 117 | CTTCTCAG | 118 | CGGTGAAT | 119 | CGCAAAGA  |
| 120 | ACGTAGTG | 121 | CACTGCAA | 122 | TGCGGTT  | 123 | CAATCCTG | 124 | CTCGCTTT  |
| 125 | TGGTTCAG | 126 | CGCCTAAT | 127 | GAAACCAG | 128 | CCTTGATG | 129 | TGGATTCCG |
| 130 | ATGTTGCG | 131 | GCAAAACG | 132 | TCAGCCTT | 133 | ACGGAACT | 134 | AAACGGTC  |
| 135 | GCCCTTAA | 136 | GGACTACA | 137 | CCATAGAG | 138 | ATAGGGAC | 139 | AGTCGTGA  |
| 140 | CCTGTGTT | 141 | AGGCTTTC | 142 | CTACATCC | 143 | AGCACGTT | 144 | GGAGAGAT  |
| 145 | CCTTGCAT | 146 | TGCCACAA | 147 | CAAAAGGC | 148 | GGTCACTA | 149 | AGAACGGA  |
| 150 | CTGAAGTC | 151 | CACCTTGA | 152 | CATTTCGT | 153 | ATGTGCAG | 154 | TAAACCCC  |
| 155 | ACATGCTG | 156 | CATTTCCG | 157 | ACCTTGAG | 158 | GATGGTCA | 159 | TCTACCTG  |
| 160 | CTAACTCG | 161 | GTACCCTT | 162 | GCATCAAC | 163 | AAGCAGGA | 164 | CAGTACAC  |
| 165 | ATGGAGAG | 166 | CGTACTTG | 167 | GGTTTGGT | 168 | CAAAGCAC | 169 | CTAAGCTG  |
| 170 | CAGTTGCA | 171 | ACTGATCG | 172 | TTAGGTCG | 173 | ACTTGCGA | 174 | GTGTTTCT  |
| 175 | CCGTCATT | 176 | TTGAGTGG | 177 | CATCGCTT | 178 | CTGGTCAA | 179 | ATGAGACC  |
| 180 | CCTCCATA | 181 | AGATGGCT | 182 | ACGACGTA | 183 | TTACACGG | 184 | TCTGACCA  |
| 185 | CAAGGGAA | 186 | CAGACATC | 187 | CGAATGTG | 188 | ACGCCAAA | 189 | TCTGCGAA  |
| 190 | ATGTCCCA | 191 | TATCGGGT | 192 | ACTGCATC | 193 | CTAGACCT | 194 | ACACTAGG  |
| 195 | TCTCGAAC | 196 | TTCCGACA | 197 | GTACACCA | 198 | GTTTCGTG | 199 | GGGATIGT  |
| 200 | AGATACCG | 201 | GTACAGAC | 202 | GTAAACGG | 203 | TGATCTCC | 204 | AAGACCGT  |
| 205 | TTTTGCC  | 206 | CAAAGTGG | 207 | GGTGTTAC | 208 | GTCGAGTA | 209 | GTTAGCTC  |
| 210 | CGATACTC | 211 | GCTATCAG | 212 | TTCGTGCA | 213 | GCAACTCT | 214 | GGACCAAT  |
| 215 | AGTTTCCC | 216 | ACCGATGT | 217 | AGGAGCTA | 218 | GAGTGTGT | 219 | ACACTGCT  |
| 220 | CTCTGAGT | 221 | GCAGATAG | 222 | CGAAGTTC | 223 | TGAAAGCC | 224 | GCAATGCA  |
| 225 | ATCGCAAC | 226 | ATGCTGAC | 227 | GACTCTTC | 228 | AGGACACA | 229 | CTCACATG  |
| 230 | GGTAGAAC | 231 | GGATTGAC | 232 | CGTAGGTA | 233 | AAGGAAGC | 234 | CGCTATAC  |
| 235 | GTCTAAGC | 236 | TGGGTACA | 237 | CACTTAGC | 238 | GATCCTGA | 239 | CTTATCCC  |
| 240 | TAACGGGG | 241 | AGTAAGGG | 242 | AGAGTGCA | 243 | AAAGGGGT | 244 | CATTGGTC  |
| 245 | AACTGTGC | 246 | ATAGCCGT | 247 | TATGCTCC | 248 | GATACGAC | 249 | GTACGTCT  |
| 250 | ACTTCGCA | 251 | CGCTATAC | 252 | TCTGAGTC | 253 | ACGAATGG | 254 | GCGAAGAT  |
| 255 | CGCTTCTT |     |          |     |          |     |          |     |           |
